# Supplementary material
Source: ML conference proceedings conference paper supplement (https://www.ecva.net/papers/eccv_2020/papers_ECCV/html/123480154_ECCV_2020_paper.php)
Supplement: Supplementary file 2 [file 123480154-supp.zip]

Archive with 3 entries (3 files):
- alderley.mp4
- ForkGAN_README.md
- 6147-supp.pdf
