# Supplementary material
Source: ML conference proceedings conference paper supplement (https://www.ecva.net/papers/eccv_2020/papers_ECCV/html/123480154_ECCV_2020_paper.php)
Supplement: Supplementary file 2 [file 123480154-supp.zip › ForkGAN_README.md]

# Paper title 
ForkGAN: Seeing into the Rainy Night

# Directory Structure
* supplementary.pdf
* ForkGAN_README.md
* Alderley.mp4

# Supplementary
The `supplementary.pdf` is the additional material related to the our paper, including ``Semantic segmentation and object detection on stormy night data`` and ``High-resolution night-to-day image translation``.

The file `Alderley.mp4` shows several video clips to show the `semantic segmentation` performance. We show segmentation outputs of the raw stormy night images and the translated daytime images. 
